# Supplementary material for: Computational screening of covalent organic frameworks for the capture of radioactive iodine and methyl iodide
Source: Royal Society of Chemistry journal article supplement (doi:10.1039/c7ce00118e), 2017-01-01
Supplement: c7ce00118e1.pdf [file c7ce00118e1.pdf]

## Supplementary Information

# Computational screening of covalent organic frameworks for the capture of radioactive iodine and methyl iodide

*Youshi Lan,<sup>a</sup> Minman Tong,<sup>b\*</sup> Qingyuan Yang<sup>\*a</sup> and Chongli Zhong<sup>a</sup>*

<sup>a</sup>Beijing Advanced Innovation Center for Soft Matter Science and Engineering, Beijing University of Chemical Technology, Beijing 100029, China.

<sup>b</sup>School of Chemistry and Chemical Engineering, Jiangsu Normal University, Xuzhou 221116, China.

\*Corresponding authors. E-mail: [qyyang@mail.buct.edu.cn](mailto:qyyang@mail.buct.edu.cn); [tongmm@jsnu.edu.cn](mailto:tongmm@jsnu.edu.cn)

## Contents

1. Structural properties of the 187 COFs in the database
2. Force field parameters and models
3. I<sub>2</sub> adsorption properties of top 10 existing COFs and the designed material
4. Properties of 12 MOFs with **pts** topology for I<sub>2</sub> adsorption
5. Properties of top 10 existing COFs and other adsorbents for CH<sub>3</sub>I adsorption

## 1. Structural properties of the 187 COFs in the database

**Table S1.** Structural properties of the 187 experimental COFs examined in this work

| Material                         | PLD (Å) | LCD (Å) | $S_{acc}$ (m <sup>2</sup> /g) | $V_{free}$ (cm <sup>3</sup> /g) | $\phi$ |
|----------------------------------|---------|---------|-------------------------------|---------------------------------|--------|
| 1. 2D-NiPc-BTDA-COF <sup>1</sup> | 12.0    | 12.3    | 1250                          | 0.68                            | 0.62   |
| 2. 3D-Py-COF <sup>2</sup>        | 21.6    | 24.4    | 7229                          | 6.62                            | 0.93   |
| 3. 3D-Py-COF-2P <sup>2</sup>     | 12.3    | 13.5    | 7310                          | 3.05                            | 0.85   |
| 4. 4PE-1P <sup>3</sup>           | 23.9    | 24.3    | 2344                          | 1.40                            | 0.73   |
| 5. 4PE-2P <sup>3</sup>           | 32.0    | 32.3    | 2458                          | 1.76                            | 0.77   |
| 6. 4PE-3P <sup>3</sup>           | 38.9    | 39.2    | 2802                          | 2.28                            | 0.81   |
| 7. 4PE-TT <sup>3</sup>           | 27.2    | 27.6    | 2234                          | 1.42                            | 0.75   |
| 8. AB-COF <sup>4</sup>           | 11.1    | 11.6    | 1948                          | 0.96                            | 0.65   |
| 9. ACOF-1 <sup>5</sup>           | 11.1    | 11.6    | 1948                          | 0.96                            | 0.65   |
| 10. AEM-COF-1 <sup>6</sup>       | 29.1    | 29.3    | 1902                          | 1.59                            | 0.76   |
| 11. AEM-COF-2 <sup>6</sup>       | 32.1    | 32.3    | 1316                          | 1.22                            | 0.72   |
| 12. ATFG-COF <sup>4</sup>        | 9.9     | 10.4    | 1517                          | 0.70                            | 0.62   |
| 13. AzO-COF <sup>7</sup>         | 34.3    | 34.5    | 2113                          | 2.01                            | 0.81   |
| 14. BDT-COF <sup>8</sup>         | 29.8    | 30.0    | 1797                          | 1.54                            | 0.77   |
| 15. BF-COF-1 <sup>9</sup>        | 8.6     | 13.3    | 5097                          | 1.96                            | 0.79   |
| 16. BF-COF-2 <sup>9</sup>        | 7.6     | 13.1    | 4300                          | 1.66                            | 0.78   |
| 17. BLP-2H-AA <sup>10</sup>      | 9.0     | 9.5     | 1115                          | 0.56                            | 0.50   |
| 18. BLP-2H-AB <sup>10</sup>      | 2.9     | 4.0     | 396                           | 0.57                            | 0.51   |
| 19. CC-TAPH-COF <sup>11</sup>    | 7.2     | 9.3     | 4355                          | 1.53                            | 0.75   |
| 20. COF-1 <sup>12</sup>          | 3.1     | 4.2     | 0                             | 0.56                            | 0.51   |
| 21. COF-10 <sup>13</sup>         | 31.3    | 31.5    | 1949                          | 1.74                            | 0.78   |
| 22. COF-102 <sup>14</sup>        | 8.0     | 9.0     | 5129                          | 1.86                            | 0.78   |
| 23. COF-103 <sup>14</sup>        | 8.5     | 9.7     | 5315                          | 2.05                            | 0.80   |
| 24. COF-105 <sup>14</sup>        | 16.1    | 18.8    | 6645                          | 5.17                            | 0.91   |
| 25. COF-108 <sup>14</sup>        | 19.1    | 27.5    | 6387                          | 5.37                            | 0.92   |

|                                          |      |      |      |      |      |
|------------------------------------------|------|------|------|------|------|
| 26. COF-11Å <sup>15</sup>                | 7.7  | 8.4  | 515  | 0.61 | 0.54 |
| 27. COF-14Å <sup>15</sup>                | 9.8  | 10.5 | 1355 | 0.75 | 0.59 |
| 28. COF-16Å <sup>15</sup>                | 12.2 | 12.7 | 1936 | 0.86 | 0.64 |
| 29. COF-18Å <sup>15</sup>                | 14.3 | 14.7 | 1705 | 0.89 | 0.66 |
| 30. COF-202 <sup>16</sup>                | 5.4  | 9.9  | 4240 | 1.39 | 0.72 |
| 31. COF-300 <sup>17</sup>                | 9.3  | 9.4  | 3301 | 1.33 | 0.73 |
| 32. COF-320 <sup>18</sup>                | 8.3  | 8.5  | 1814 | 0.89 | 0.63 |
| 33. COF-366 <sup>19</sup>                | 18.7 | 20.5 | 4107 | 2.24 | 0.81 |
| 34. COF-42-bnn <sup>20</sup>             | 16.8 | 17.2 | 2686 | 1.30 | 0.73 |
| 35. COF-42-gra <sup>20</sup>             | 5.1  | 6.0  | 2346 | 1.00 | 0.66 |
| 36. COF-43-bnn <sup>20</sup>             | 32.3 | 32.5 | 2630 | 2.36 | 0.82 |
| 37. COF-43-gra <sup>20</sup>             | 13.4 | 13.6 | 3769 | 1.77 | 0.78 |
| 38. COF-5 <sup>12</sup>                  | 23.4 | 23.7 | 1707 | 1.24 | 0.72 |
| 39. COF-505 <sup>21</sup>                | 2.0  | 3.7  | 0    | 0.22 | 0.32 |
| 40. COF-6 <sup>13</sup>                  | 8.6  | 9.1  | 1128 | 0.53 | 0.53 |
| 41. COF-66 <sup>19</sup>                 | 21.9 | 22.2 | 1742 | 1.24 | 0.73 |
| 42. COF-8 <sup>13</sup>                  | 16.2 | 16.5 | 1601 | 0.93 | 0.65 |
| 43. COF-AA-H <sup>22</sup>               | 25.3 | 25.7 | 2314 | 1.45 | 0.74 |
| 44. COF <sub>BTA-PDA</sub> <sup>23</sup> | 16.8 | 17.1 | 2403 | 1.36 | 0.71 |
| 45. CTF-NDC <sup>24</sup>                | 3.3  | 4.3  | 0    | 0.26 | 0.35 |
| 46. COF-JLU2 <sup>25</sup>               | 9.9  | 10.4 | 1368 | 0.67 | 0.60 |
| 47. COF-JLU3 <sup>26</sup>               | 11.3 | 12.1 | 4393 | 1.70 | 0.75 |
| 48. COF-LZU1 <sup>27</sup>               | 15.6 | 16.0 | 2172 | 1.24 | 0.71 |
| 49. COF-LZU8 <sup>28</sup>               | 13.0 | 13.5 | 805  | 0.82 | 0.62 |
| 50. COF-SDU1 <sup>29</sup>               | 43.1 | 43.3 | 2409 | 2.60 | 0.84 |
| 51. COF-TpAzo <sup>30</sup>              | 25.8 | 26.1 | 2081 | 1.56 | 0.78 |
| 52. CoPc-PorDBA <sup>31</sup>            | 24.7 | 25.5 | 4128 | 2.76 | 0.85 |
| 53. CPF-1 <sup>32</sup>                  | 23.1 | 24.0 | 5087 | 2.96 | 0.86 |
| 54. CPF-2 <sup>32</sup>                  | 21.6 | 22.5 | 5177 | 2.82 | 0.86 |

|                                                          |      |      |      |      |      |
|----------------------------------------------------------|------|------|------|------|------|
| 55. CS-COF <sup>33</sup>                                 | 20.2 | 20.4 | 1620 | 1.01 | 0.66 |
| 56. CTC-COF <sup>34</sup>                                | 18.7 | 18.8 | 1513 | 0.91 | 0.65 |
| 57. CTF-0 <sup>35</sup>                                  | 1.3  | 2.6  | 0    | 0.15 | 0.25 |
| 58. CTF-1 <sup>36</sup>                                  | 8.4  | 8.9  | 1004 | 0.50 | 0.51 |
| 59. CTF-2-AA <sup>37</sup>                               | 10.6 | 11.0 | 1251 | 0.61 | 0.55 |
| 60. CTF-2-AB <sup>37</sup>                               | 3.3  | 4.9  | 443  | 0.61 | 0.55 |
| 61. CTF_FUM <sup>24</sup>                                | 6.0  | 6.7  | 1045 | 0.50 | 0.52 |
| 62. CuP-Ph COF <sup>38</sup>                             | 19.0 | 20.1 | 4025 | 2.32 | 0.83 |
| 63. CuP-SQ-COF <sup>39</sup>                             | 11.3 | 12.9 | 3240 | 1.46 | 0.76 |
| 64. CuP-TFPh COF <sup>40</sup>                           | 17.9 | 19.0 | 4439 | 2.07 | 0.83 |
| 65. DA-COF <sup>41</sup>                                 | 19.1 | 19.4 | 1646 | 1.08 | 0.71 |
| 66. DAAQ-TFP-COF <sup>42</sup>                           | 22.0 | 22.2 | 1761 | 1.18 | 0.73 |
| 67. DBA-COF <sup>143</sup>                               | 29.2 | 29.4 | 1965 | 1.59 | 0.76 |
| 68. DBA-COF <sup>243</sup>                               | 34.2 | 34.4 | 2127 | 2.00 | 0.80 |
| 69. BDT-OEt-COF <sup>8</sup>                             | 23.2 | 23.5 | 1851 | 1.18 | 0.72 |
| 70. 2,3-DhaTab <sup>44</sup>                             | 29.1 | 29.3 | 2098 | 1.81 | 0.78 |
| 71. 2,5-DhaTab <sup>44</sup>                             | 29.5 | 29.6 | 2212 | 1.87 | 0.78 |
| 72. DhaTab <sup>45</sup>                                 | 32.1 | 32.3 | 2130 | 1.99 | 0.79 |
| 73. 2,3-DhaTph <sup>46</sup>                             | 18.2 | 19.2 | 4381 | 2.34 | 0.82 |
| 74. 2,5-DhaTph <sup>44</sup>                             | 17.4 | 18.5 | 4382 | 2.34 | 0.82 |
| 75. 2,3-DhaTta <sup>47</sup>                             | 29.2 | 29.2 | 2093 | 1.82 | 0.79 |
| 76. 2,3-DmaTph <sup>46</sup>                             | 16.4 | 17.6 | 4206 | 2.14 | 0.81 |
| 77. D <sub>TP</sub> -A <sub>NDI</sub> -COF <sup>48</sup> | 43.8 | 43.9 | 1842 | 2.19 | 0.82 |
| 78. EB-COF:Br <sup>49</sup>                              | 10.0 | 10.6 | 1336 | 0.62 | 0.58 |
| 79. H <sub>2</sub> P-COF <sup>50</sup>                   | 19.2 | 20.3 | 4417 | 2.54 | 0.83 |
| 80. HAT-COF <sup>51</sup>                                | 9.1  | 9.9  | 1734 | 0.84 | 0.63 |
| 81. TTF-Py-COF <sup>52</sup>                             | 14.3 | 14.5 | 2054 | 1.10 | 0.69 |
| 82. HBC-COF <sup>53</sup>                                | 10.6 | 10.8 | 1520 | 0.74 | 0.59 |
| 83. HCC-H <sub>2</sub> P-COF <sup>54</sup>               | 14.4 | 15.7 | 4134 | 2.07 | 0.80 |

|                                                          |      |      |      |      |      |
|----------------------------------------------------------|------|------|------|------|------|
| 84. HO-H <sub>2</sub> P-COF <sup>55</sup>                | 17.5 | 18.5 | 4399 | 2.36 | 0.83 |
| 85. HO <sub>2</sub> C-H <sub>2</sub> P-COF <sup>55</sup> | 9.4  | 10.9 | 4927 | 1.90 | 0.79 |
| 86. HP-COF-1 <sup>56</sup>                               | 14.4 | 14.8 | 2003 | 1.06 | 0.67 |
| 87. HP-COF-2 <sup>56</sup>                               | 16.8 | 17.2 | 2429 | 1.35 | 0.72 |
| 88. HPB-COF <sup>53</sup>                                | 5.8  | 7.6  | 2479 | 0.96 | 0.65 |
| 89. ICOF-1 <sup>57</sup>                                 | 15.0 | 15.2 | 2146 | 1.20 | 0.70 |
| 90. ICOF-2 <sup>57</sup>                                 | 16.6 | 17.2 | 2383 | 1.32 | 0.72 |
| 91. ILCOF-1-AA <sup>58</sup>                             | 20.8 | 21.2 | 3865 | 2.57 | 0.83 |
| 92. ILCOF-1-AB <sup>58</sup>                             | 9.4  | 11.1 | 6714 | 2.42 | 0.82 |
| 93. iPrTAPB-TFP <sup>59</sup>                            | 6.5  | 7.5  | 712  | 0.49 | 0.48 |
| 94. iPrTAPB-TFPB <sup>59</sup>                           | 15.4 | 15.9 | 1738 | 1.07 | 0.66 |
| 95. MPCOF <sup>60</sup>                                  | 9.8  | 10.3 | 1394 | 0.66 | 0.61 |
| 96. NPN-1 <sup>61</sup>                                  | 4.1  | 5.3  | 958  | 0.49 | 0.51 |
| 97. NPN-2 <sup>61</sup>                                  | 4.2  | 5.3  | 1125 | 0.56 | 0.54 |
| 98. NPN-3 <sup>61</sup>                                  | 5.4  | 6.1  | 941  | 0.47 | 0.50 |
| 99. NN-TAPH-COF <sup>11</sup>                            | 7.2  | 9.3  | 4435 | 1.53 | 0.75 |
| 100. NTU-COF-1 <sup>62</sup>                             | 18.4 | 18.7 | 1916 | 1.20 | 0.70 |
| 101. NTU-COF-2 <sup>62</sup>                             | 24.6 | 24.8 | 2117 | 1.70 | 0.77 |
| 102. NUS-2 <sup>63</sup>                                 | 9.9  | 10.4 | 1368 | 0.67 | 0.60 |
| 103. NUS-3 <sup>63</sup>                                 | 16.7 | 17.0 | 2036 | 0.99 | 0.68 |
| 104. EB-COF:Cl <sup>49</sup>                             | 10.0 | 10.6 | 1490 | 0.69 | 0.59 |
| 105. OH-TAPH-COF <sup>11</sup>                           | 17.5 | 18.5 | 4369 | 2.44 | 0.83 |
| 106. TpPa-Py <sup>64</sup>                               | 16.0 | 16.3 | 1649 | 0.95 | 0.66 |
| 107. PC-COF <sup>65</sup>                                | 41.1 | 41.1 | 3056 | 3.01 | 0.85 |
| 108. Pc-PBBA-COF <sup>66</sup>                           | 16.5 | 16.8 | 1391 | 0.81 | 0.64 |
| 109. PCTF-1 <sup>67</sup>                                | 13.4 | 13.7 | 1872 | 1.07 | 0.68 |
| 110. PCTF-2 <sup>67</sup>                                | 21.4 | 21.5 | 2279 | 1.57 | 0.75 |
| 111. PCTF-3 <sup>67</sup>                                | 27.7 | 27.8 | 2364 | 1.95 | 0.79 |
| 112. PCTF-4 <sup>67</sup>                                | 17.5 | 17.9 | 1942 | 1.24 | 0.72 |

|      |                                 |      |      |      |      |      |
|------|---------------------------------|------|------|------|------|------|
| 113. | Ph-An-COF <sup>68</sup>         | 22.1 | 22.3 | 1701 | 1.16 | 0.71 |
| 114. | Ph-AnCD-COF <sup>68</sup>       | 21.0 | 23.7 | 5283 | 2.76 | 0.85 |
| 115. | PI-2-COF <sup>69</sup>          | 23.4 | 23.7 | 2286 | 1.57 | 0.75 |
| 116. | PI-3-COF <sup>69</sup>          | 30.4 | 30.6 | 2280 | 2.03 | 0.80 |
| 117. | PI-COF-4 <sup>69</sup>          | 13.4 | 17.5 | 5113 | 3.19 | 0.88 |
| 118. | PI-COF-4-2P <sup>70</sup>       | 7.6  | 8.2  | 5020 | 1.36 | 0.75 |
| 119. | PI-COF-5 <sup>70</sup>          | 22.4 | 26.6 | 6479 | 7.30 | 0.94 |
| 120. | PI-COF-5-2P <sup>70</sup>       | 10.5 | 13.4 | 6543 | 3.42 | 0.88 |
| 121. | Por-COF <sup>71</sup>           | 18.6 | 20.4 | 4010 | 2.24 | 0.81 |
| 122. | POR-COF <sup>72</sup>           | 12.6 | 14.1 | 3548 | 1.54 | 0.77 |
| 123. | PPy-COF <sup>73</sup>           | 13.3 | 13.7 | 1332 | 0.65 | 0.57 |
| 124. | Py-2,2'-BPyPh-COF <sup>74</sup> | 23.2 | 23.5 | 2251 | 1.64 | 0.77 |
| 125. | Py-2,3-BPyPh-COF <sup>74</sup>  | 22.7 | 22.9 | 2243 | 1.62 | 0.76 |
| 126. | Py-2,3-DHPh-COF <sup>74</sup>   | 21.0 | 21.5 | 4568 | 2.70 | 0.85 |
| 127. | EB-COF:F <sup>49</sup>          | 10.0 | 10.6 | 1594 | 0.73 | 0.60 |
| 128. | Py-An-COF <sup>75</sup>         | 19.2 | 19.5 | 2344 | 1.47 | 0.74 |
| 129. | Py-Azine-COF <sup>76</sup>      | 12.5 | 13.0 | 2031 | 1.11 | 0.69 |
| 130. | EB-COF:I <sup>49</sup>          | 9.6  | 10.3 | 1530 | 0.60 | 0.53 |
| 131. | Py-COF <sup>77</sup>            | 21.6 | 24.4 | 7229 | 6.62 | 0.93 |
| 132. | NUS-9 <sup>78</sup>             | 12.0 | 13.0 | 2392 | 1.23 | 0.74 |
| 133. | Py-DHPh-COF <sup>74</sup>       | 19.9 | 20.2 | 4796 | 2.70 | 0.85 |
| 134. | NUS-10 <sup>78</sup>            | 12.0 | 13.0 | 1959 | 0.95 | 0.70 |
| 135. | Star-COF-1 <sup>79</sup>        | 30.4 | 30.6 | 1371 | 1.22 | 0.71 |
| 136. | Star-COF-2 <sup>79</sup>        | 37.3 | 37.4 | 1496 | 1.51 | 0.75 |
| 137. | Star-COF-3 <sup>79</sup>        | 40.0 | 40.2 | 1602 | 1.72 | 0.77 |
| 138. | T-COF 1 <sup>80</sup>           | 7.6  | 8.2  | 1045 | 0.48 | 0.51 |

|      |                                            |      |      |      |      |      |
|------|--------------------------------------------|------|------|------|------|------|
| 139. | T-COF 2 <sup>80</sup>                      | 14.6 | 14.9 | 1507 | 0.82 | 0.63 |
| 140. | T-COF 3 <sup>80</sup>                      | 12.4 | 12.7 | 1272 | 0.63 | 0.58 |
| 141. | TAPB-PDA COF <sup>81</sup>                 | 32.1 | 32.3 | 2410 | 2.21 | 0.80 |
| 142. | TAPB-TFP <sup>59</sup>                     | 11.6 | 12.0 | 1496 | 0.80 | 0.62 |
| 143. | TAPB-TFPB <sup>59</sup>                    | 19.0 | 19.3 | 1973 | 1.32 | 0.71 |
| 144. | TBPB-COF <sup>82</sup>                     | 16.4 | 16.7 | 1677 | 0.98 | 0.64 |
| 145. | TD-COF-5 <sup>83</sup>                     | 27.9 | 28.4 | 4465 | 3.42 | 0.87 |
| 146. | DAB-TFP-COF <sup>42</sup>                  | 22.0 | 22.3 | 1739 | 1.20 | 0.73 |
| 147. | TfpBDH <sup>84</sup>                       | 36.2 | 36.3 | 2102 | 2.08 | 0.81 |
| 148. | TFPT-COF <sup>85</sup>                     | 34.2 | 34.4 | 2131 | 2.02 | 0.80 |
| 149. | TH-COF-1 <sup>86</sup>                     | 11.7 | 12.1 | 1561 | 0.65 | 0.60 |
| 150. | Tp-Azo <sup>87</sup>                       | 25.5 | 25.7 | 1829 | 1.36 | 0.75 |
| 151. | TP-COF <sup>88</sup>                       | 28.5 | 28.7 | 1758 | 1.42 | 0.75 |
| 152. | Tp-Por-COF-AA <sup>89</sup>                | 41.1 | 41.2 | 1907 | 2.10 | 0.81 |
| 153. | Tp-Por-COF-AB <sup>89</sup>                | 19.9 | 20.1 | 2880 | 1.73 | 0.78 |
| 154. | Tp-Stb <sup>87</sup>                       | 22.3 | 22.5 | 1987 | 1.33 | 0.73 |
| 155. | TpBD-2NO <sub>2</sub> <sup>90</sup>        | 21.5 | 21.7 | 1638 | 1.13 | 0.71 |
| 156. | TPBD-ME <sub>2</sub> <sup>90</sup>         | 21.6 | 21.6 | 1523 | 1.03 | 0.68 |
| 157. | TpBD-NH <sub>2</sub> <sup>91</sup>         | 22.1 | 22.2 | 1705 | 1.20 | 0.72 |
| 158. | TpBD-<br>NHCOCH <sub>3</sub> <sup>91</sup> | 17.7 | 18.1 | 1335 | 0.85 | 0.64 |
| 159. | TpBD-NO <sub>2</sub> <sup>90</sup>         | 21.2 | 21.4 | 1517 | 0.98 | 0.69 |
| 160. | TpBD-(OMe) <sub>2</sub> <sup>90</sup>      | 19.9 | 20.3 | 2149 | 1.34 | 0.73 |
| 161. | TpBD <sup>92</sup>                         | 22.6 | 22.9 | 1717 | 1.20 | 0.71 |
| 162. | TpBDH <sup>93</sup>                        | 21.9 | 22.2 | 1504 | 1.04 | 0.71 |
| 163. | TpPa-1-F <sub>2</sub> <sup>90</sup>        | 15.3 | 15.6 | 1359 | 0.77 | 0.64 |
| 164. | TpPa-1 <sup>94</sup>                       | 15.8 | 16.1 | 1643 | 0.93 | 0.66 |
| 165. | TpPa-2 <sup>94</sup>                       | 13.4 | 13.8 | 1586 | 0.78 | 0.61 |
| 166. | TpPa-F <sub>4</sub> <sup>90</sup>          | 14.6 | 14.9 | 1084 | 0.59 | 0.60 |

|      |                                         |      |      |      |      |      |
|------|-----------------------------------------|------|------|------|------|------|
| 167. | TpPA-NO <sub>2</sub> <sup>90</sup>      | 11.1 | 11.4 | 1281 | 0.61 | 0.58 |
| 168. | TpPa-SO <sub>3</sub> H-Py <sup>95</sup> | 16.0 | 16.3 | 1523 | 0.83 | 0.64 |
| 169. | TpPa-SO <sub>3</sub> H <sup>90</sup>    | 12.2 | 12.5 | 1289 | 0.63 | 0.59 |
| 170. | TPT-COF-1 <sup>96</sup>                 | 21.6 | 21.9 | 2122 | 1.38 | 0.74 |
| 171. | TPT-COF-2 <sup>96</sup>                 | 33.8 | 33.9 | 2468 | 2.18 | 0.81 |
| 172. | TpTG-Br <sup>97</sup>                   | 2.6  | 3.2  | 0    | 0.20 | 0.35 |
| 173. | TpTG-Cl <sup>97</sup>                   | 2.8  | 3.4  | 0    | 0.23 | 0.36 |
| 174. | TpTG-I <sup>97</sup>                    | 2.4  | 3.0  | 0    | 0.17 | 0.34 |
| 175. | TRIPTA <sup>98</sup>                    | 11.9 | 12.4 | 1503 | 0.79 | 0.62 |
| 176. | TT-COF <sup>99</sup>                    | 26.1 | 26.3 | 1610 | 1.30 | 0.74 |
| 177. | TTF-COF <sup>100</sup>                  | 18.1 | 18.6 | 3391 | 1.92 | 0.79 |
| 178. | TThPP <sup>101</sup>                    | 16.7 | 17.8 | 3780 | 2.08 | 0.81 |
| 179. | ZnP-COF <sup>50</sup>                   | 17.9 | 19.0 | 4000 | 2.27 | 0.82 |
| 180. | ZnPc-COF <sup>102</sup>                 | 16.6 | 17.0 | 1409 | 0.85 | 0.66 |
| 181. | ZnPc-DPB <sup>102</sup>                 | 26.6 | 26.8 | 1798 | 1.39 | 0.76 |
| 182. | ZnPc-NDI <sup>102</sup>                 | 27.0 | 27.2 | 1428 | 1.20 | 0.73 |
| 183. | ZnPc-PPE <sup>102</sup>                 | 32.1 | 32.2 | 2060 | 1.84 | 0.79 |
| 184. | ZnPc-Py <sup>102</sup>                  | 18.3 | 18.5 | 1312 | 0.85 | 0.66 |
| 185. | N3-COF <sup>103</sup>                   | 18.2 | 18.5 | 1885 | 1.23 | 0.71 |
| 186. | TTI-COF <sup>104</sup>                  | 18.2 | 18.5 | 1959 | 1.26 | 0.71 |
| 187. | NUS-14 <sup>105</sup>                   | 40.7 | 40.8 | 2537 | 2.71 | 0.84 |

PLD and LCD represent the pore limiting diameter and largest cavity diameter, respectively. Accessible surface area ( $S_{acc}$ ) of each material was calculated by a probe molecule with a size equal to the kinetic diameter of N<sub>2</sub> (3.68 Å), while a probe size of 0.0 Å was applied to calculate the free volume ( $V_{free}$ ) which is the absolute amount of volume not occupied by the framework atoms. The void fraction ( $\phi$ ) was determined from the ratio of free volume to the total volume of the cell.



## 2. Force field parameters and models

**Table S2.** Potential parameters iodine<sup>106</sup> and methyl iodide<sup>107</sup> used in this work

| Atomic type            | $\sigma$ (Å) | $\epsilon/k_B$ (K) | $q$ (e) |
|------------------------|--------------|--------------------|---------|
| Iodine                 |              |                    |         |
| I <sub>2</sub> -united | 4.98         | 550.0              | 0.0     |
| Methyl iodide          |              |                    |         |
| CH <sub>3</sub> I_H    | 2.20         | 10.01              | 0.052   |
| CH <sub>3</sub> I_C    | 3.40         | 51.22              | -0.020  |
| CH <sub>3</sub> I_I    | 4.12         | 324.06             | -0.137  |

**Table S3.** Potential parameters for the framework atoms of COFs<sup>108</sup>

| Atomic type | $\sigma$ (Å) | $\epsilon/k_B$ (K) |
|-------------|--------------|--------------------|
| H           | 2.57         | 22.14              |
| B           | 3.64         | 90.58              |
| C           | 3.43         | 52.84              |
| N           | 3.26         | 34.72              |
| O           | 3.12         | 30.20              |
| F           | 3.00         | 25.16              |
| Si          | 3.83         | 202.31             |
| P           | 3.70         | 153.50             |
| S           | 3.60         | 137.89             |
| Cl          | 3.52         | 114.24             |
| Br          | 3.73         | 126.32             |
| I           | 4.01         | 170.60             |
| Zn          | 2.46         | 62.40              |
| Cu          | 3.11         | 2.52               |
| Ni          | 2.52         | 7.55               |

**Table S4.** Comparison of the I<sub>2</sub> uptakes calculated using UFF and DREIDING force fields

| <b>Material</b>      | <b>I<sub>2</sub> uptake (g/g)</b> |                               |
|----------------------|-----------------------------------|-------------------------------|
|                      | <b>UFF</b>                        | <b>DREIDING<sup>109</sup></b> |
| COF-108              | 13.59                             | 13.81                         |
| COF-105              | 12.67                             | 13.04                         |
| Ph-AnCD-COF          | 6.85                              | 7.12                          |
| H <sub>2</sub> P-COF | 5.43                              | 5.73                          |
| COF-103              | 4.98                              | 5.27                          |
| COF-10               | 3.99                              | 4.10                          |
| POR-COF              | 3.32                              | 3.46                          |
| COF-202              | 2.83                              | 2.92                          |
| COF-LZU1             | 2.10                              | 2.20                          |
| COF-6                | 1.11                              | 1.12                          |

To justify the use of UFF force field for the COFs, we arbitrarily selected 10 different COFs and performed GCMC simulations to examine their I<sub>2</sub> uptakes at 423 K and 1 bar using the DREIDING force field<sup>109</sup>, which is another popular force field that have been widely adopted in the studies of MOFs and COFs. As can be seen from the results shown in Table S4, the I<sub>2</sub> uptakes of these COFs are respectively very similar to those obtained using the UFF force field. Considering that the UFF one has been validated for I<sub>2</sub> adsorption in MOFs, it was also adopted in current study and the potential parameters are given in Table S3.

### 3. I<sub>2</sub> adsorption properties of the top 10 existing COFs and the designed material

**Table S5.** Structural features and the uptakes of the top 10 COFs identified for I<sub>2</sub> adsorption

| Material     | Dimension | Topology/<br>pore shape | I <sub>2</sub> uptake<br>(g/g) | LCD<br>(Å) | S <sub>acc</sub><br>(m <sup>2</sup> /g) | $\varphi$ |
|--------------|-----------|-------------------------|--------------------------------|------------|-----------------------------------------|-----------|
| 3D-Py-COF    | 3D        | <b>pts</b>              | 16.7                           | 24.4       | 7229                                    | 0.93      |
| COF-108      | 3D        | <b>bor</b>              | 13.8                           | 27.5       | 6386                                    | 0.92      |
| COF-105      | 3D        | <b>ctn</b>              | 13.0                           | 18.8       | 6644                                    | 0.91      |
| PI-COF-5-2P  | 3D        | <b>dia</b>              | 8.7                            | 13.4       | 6542                                    | 0.88      |
| TD-COF-5     | 2D        | <b>hexagonal</b>        | 8.7                            | 28.4       | 4464                                    | 0.87      |
| 3D-Py-COF-2P | 3D        | <b>pts</b>              | 8.1                            | 13.5       | 7309                                    | 0.85      |
| PI-COF-4     | 3D        | <b>dia</b>              | 7.8                            | 17.5       | 5113                                    | 0.88      |
| Ph-AnCD-COF  | 2D        | <b>hexagonal</b>        | 7.1                            | 23.7       | 5283                                    | 0.85      |
| CPF-1        | 2D        | <b>square</b>           | 6.9                            | 24.0       | 5086                                    | 0.86      |
| CoPc-PorDBA  | 2D        | <b>square</b>           | 6.5                            | 25.5       | 4128                                    | 0.85      |

**Table S6.** Fractional atomic coordinates for the designed 3D-Py-COF-TANM in this work

| <b>3D-Py-COF-TANM</b> |          |          |          |             |          |          |          |
|-----------------------|----------|----------|----------|-------------|----------|----------|----------|
| Cubic, P42/MMC        |          |          |          |             |          |          |          |
| a=b=28.198 c=39.256   |          |          |          |             |          |          |          |
| <b>Atom</b>           | <b>X</b> | <b>Y</b> | <b>Z</b> | <b>Atom</b> | <b>X</b> | <b>Y</b> | <b>Z</b> |
| <b>H1</b>             | 0.2132   | 0.5000   | 0.1035   | <b>C20</b>  | 0.5000   | 0.3551   | 0.2936   |
| <b>H2</b>             | 0.0468   | 0.5000   | 0.1492   | <b>C21</b>  | 0.5000   | 0.3617   | 0.2574   |
| <b>H3</b>             | 0.1132   | 0.5000   | 0.1890   | <b>C22</b>  | 0.5000   | 0.3942   | 0.3156   |
| <b>C4</b>             | 0.0463   | 0.5000   | 0.0757   | <b>C23</b>  | 0.5000   | 0.4091   | 0.2451   |
| <b>H5</b>             | 0.1483   | 0.5000   | 0.0634   | <b>C24</b>  | 0.5000   | 0.4400   | 0.3021   |
| <b>C6</b>             | 0.9566   | 0.5000   | 0.0386   | <b>C25</b>  | 0.5000   | 0.4502   | 0.2667   |
| <b>C7</b>             | 0.9167   | 0.5000   | 0.0176   | <b>C26</b>  | 0.5000   | 0.2756   | 0.2496   |
| <b>C8</b>             | 0.9127   | 0.5000   | 0.0997   | <b>H27</b>  | 0.5000   | 0.3885   | 0.3444   |
| <b>C9</b>             | 0.8246   | 0.5000   | 0.1138   | <b>H28</b>  | 0.5000   | 0.4720   | 0.3198   |
| <b>C10</b>            | 0.8317   | 0.5000   | 0.1491   | <b>H29</b>  | 0.5000   | 0.4161   | 0.2165   |
| <b>C11</b>            | 0.7904   | 0.5000   | 0.1690   | <b>C30</b>  | 0.5000   | 0.6782   | 0.2349   |
| <b>N12</b>            | 0.7776   | 0.5000   | 0.2025   | <b>H31</b>  | 0.5000   | 0.3041   | 0.3365   |
| <b>C13</b>            | 0.1368   | 0.5000   | 0.0912   | <b>H32</b>  | 0.5000   | 0.2438   | 0.2317   |
| <b>C14</b>            | 0.1212   | 0.5000   | 0.1605   | <b>H33</b>  | 0.5000   | 0.6725   | 0.2061   |
| <b>H15</b>            | 0.8797   | 0.5000   | 0.0293   | <b>C34</b>  | 0.0000   | 0.5000   | 0.0190   |
| <b>C16</b>            | 0.0833   | 0.5000   | 0.1367   | <b>C35</b>  | 0.0000   | 0.5000   | 0.0901   |
| <b>H17</b>            | 0.7541   | 0.5000   | 0.1562   | <b>H36</b>  | 0.0000   | 0.5000   | 0.1190   |
| <b>C18</b>            | 0.5000   | 0.2683   | 0.2857   | <b>C37</b>  | 0.5000   | 0.5000   | 0.2500   |
| <b>C19</b>            | 0.5000   | 0.3090   | 0.3077   |             |          |          |          |

#### 4. Properties of 12 MOFs with pts topology for I<sub>2</sub> adsorption

**Table S7.** Structural features and I<sub>2</sub> uptakes (423 K and 1 bar) of 12 MOFs with pts topology

| <b>Material<sup>a</sup></b> | <b>LCD (Å)</b> | <b><math>S_{\text{acc}}</math><br/>(m<sup>2</sup>/g)</b> | <b><math>\varphi</math></b> | <b>I<sub>2</sub> uptake<br/>(g/g)</b> |
|-----------------------------|----------------|----------------------------------------------------------|-----------------------------|---------------------------------------|
| FEBXIV                      | 15.9           | 5216                                                     | 0.88                        | 7.1                                   |
| FEBXOB                      | 13.0           | 5353                                                     | 0.84                        | 5.8                                   |
| FEBXER                      | 12.5           | 5124                                                     | 0.85                        | 5.8                                   |
| EFAYEQ                      | 10.5           | 4647                                                     | 0.78                        | 3.8                                   |
| EFAYIU                      | 10.4           | 4679                                                     | 0.78                        | 3.8                                   |
| SUKYON                      | 10.8           | 4826                                                     | 0.76                        | 3.1                                   |
| ENITAX                      | 10.1           | 4033                                                     | 0.78                        | 3.0                                   |
| PUWDAM                      | 9.4            | 3743                                                     | 0.75                        | 2.9                                   |
| SUKYIH                      | 9.6            | 3743                                                     | 0.75                        | 2.8                                   |
| DAKVOC                      | 10.8           | 2349                                                     | 0.72                        | 2.4                                   |
| DAKVUI                      | 10.8           | 2213                                                     | 0.71                        | 2.3                                   |
| IVETOT                      | 9.2            | 2298                                                     | 0.65                        | 2.1                                   |

<sup>a</sup> Names of MOFs were denoted using the refcodes in the Cambridge Structural Database (CSD).

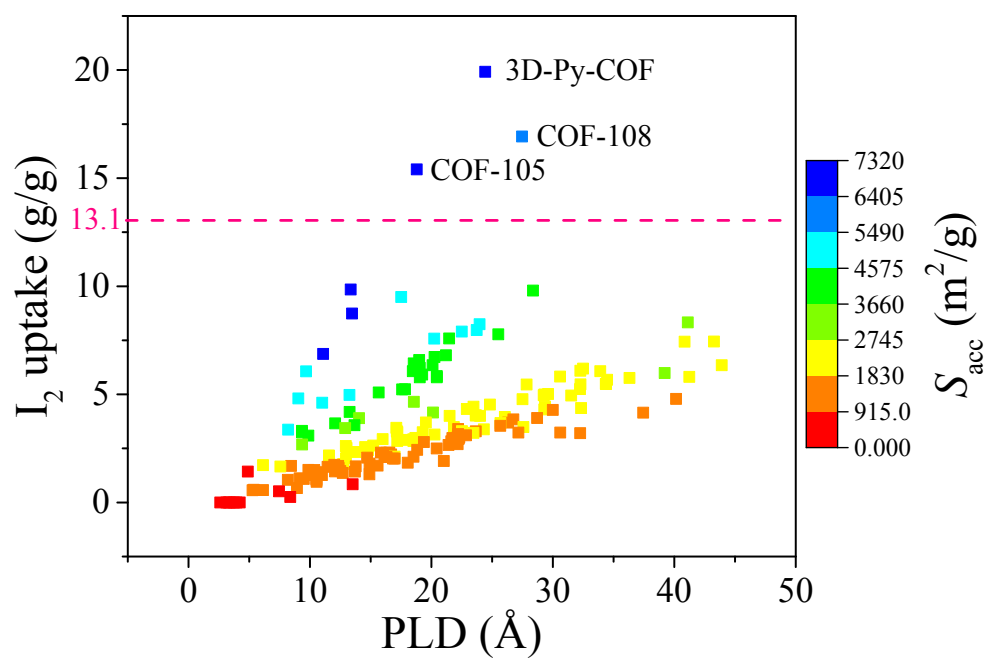

**Fig. S1.** Performance of the 187 COFs for  $I_2$  adsorption at 298 K and 1 bar. The horizontal dashed line represents the  $I_2$  uptake of the best MOF (NU-110) reported so far.

## 5. Properties of top 10 existing COFs and other adsorbents for CH<sub>3</sub>I adsorption

**Table S8.** Structural features and the CH<sub>3</sub>I uptakes of the top 10 COFs

| Material    | Dimension | Topology         | CH <sub>3</sub> I uptake<br>(g/g) | LCD<br>(Å) | $S_{acc}$<br>(m <sup>2</sup> /g) | $\phi$ |
|-------------|-----------|------------------|-----------------------------------|------------|----------------------------------|--------|
| COF-103     | 3D        | <b>ctn</b>       | 2.8                               | 9.7        | 5315                             | 0.80   |
| COF-102     | 3D        | <b>ctn</b>       | 2.6                               | 9.0        | 5129                             | 0.78   |
| BF-COF-1    | 3D        | <b>ctn</b>       | 2.1                               | 8.2        | 5175                             | 0.78   |
| BF-COF-2    | 3D        | <b>ctn</b>       | 1.8                               | 8.0        | 4485                             | 0.76   |
| COF-202     | 3D        | <b>ctn</b>       | 1.7                               | 9.9        | 4240                             | 0.72   |
| PI-COF-4-2P | 3D        | <b>dia</b>       | 1.6                               | 8.2        | 5020                             | 0.75   |
| COF-300     | 3D        | <b>dia</b>       | 1.4                               | 9.4        | 3301                             | 0.73   |
| POR-COF     | 2D        | <b>square</b>    | 1.2                               | 14.1       | 3548                             | 0.77   |
| RT-COF-1    | 2D        | <b>hexagonal</b> | 1.1                               | 12.3       | 1724                             | 0.61   |
| TTF-Py-COF  | 2D        | <b>square</b>    | 1.1                               | 14.5       | 2054                             | 0.69   |

**Table S9.** Comparison of the CH<sub>3</sub>I adsorption performance between the top 3 COFs and other adsorbents.

| Material                          | CH <sub>3</sub> I uptake<br>(g/g) | Temperature<br>(K) | Ref.      |
|-----------------------------------|-----------------------------------|--------------------|-----------|
| Zeolite (NaX)                     | 0.10                              | 373                | 110       |
| Zeocarbon                         | 0.10                              | >323               | 111       |
| Activated carbon (AC)             | 0.32                              | >323               | 111       |
| Silver-Exchanged Zeolite (AgX)    | 0.25                              | 373                | 111       |
| Silver-impregnated alumina (Ag-A) | 0.22                              | >373               | 111       |
| TEDA-Impregnated AC               | 0.47                              | 303                | 112       |
| COF-103                           | 2.78                              | 423                | This work |
| COF-102                           | 2.58                              | 423                | This work |
| BF-COF-1                          | 2.05                              | 423                | This work |



## References

- 1 X. Ding, L. Chen, Y. Honsho, X. Feng, O. Saengsawang, J. Guo, A. Saeki, S. Seki, S. Irle, S. Nagase, V. Parasuk and D. Jiang, *J. Am. Chem. Soc.*, 2011, 133, 14510.
- 2 G. Lin, H. Ding, D. Yuan, B. Wang and C. Wang, *J. Am. Chem. Soc.*, 2016, 138, 302.
- 3 L. Ascherl, T. Sick, J. T. Margraf, S. H. Lapidus, M. Calik, C. Hettstedt, K. Karaghiosoff, M. Döblinger, T. Clark, K. W. Chapman, F. Auras and T. Bein, *Nat. Chem.*, 2016, 8, 310.
- 4 L. Stegbauer, M. W. Hahn, A. Jentys, G. Savasci, C. Ochsenfeld, J. A. Lercher and B. V. Lotsch, *Chem. Mater.*, 2015, 27, 7874.
- 5 Z. Li, X. Feng, Y. Zou, Y. Zhang, H. Xia, X. Liu and Y. Mu, *Chem. Commun.*, 2014, **50**, 13825.
- 6 H. Yang, Y. Du, S. Wan, G. D. Trahan, Y. Jin and W. Zhang, *Chem. Sci.*, 2015, **6**, 4049.
- 7 J. Zhang, L. Wang, N. Li, J. Liu, W. Zhang, Z. Zhang, N. Zhou and X. Zhu, *CrystEngComm*, 2014, **16**, 6547.
- 8 M. S. Lohse, J. M. Rotter, J. T. Margraf, V. Werner, M. Becker, S. Herbert, P. Knochel, T. Clark, T. Bein and D. D. Medina, *CrystEngComm*, 2016, **18**, 4295-4302.
- 9 Q. Fang, S. Gu, J. Zheng, Z. Zhuang, S. Qiu and Y. Yan, *Angew. Chem. Int. Ed.*, 2014, **53**, 2878.
- 10 K. T. Jackson, T. E. Reich and H. M. El-Kaderi, *Chem. Commun.*, 2012, **48**, 8823.
- 11 S. Zhao, B. Dong, R. Ge, C. Wang, X. Song, W. Ma, Y. Wang, C. Hao, X. Guo and Y. Gao, *RSC Adv.* 2016, **6**, 38774.
- 12 A. P. Cote, A. I. Benin, N. W. Ockwig, M. O'Keeffe, A. J. Matzger and O. M. Yaghi, *Science* 2005, **310**, 1166.
- 13 A. P. Côté, H. M. El-Kaderi, H. Furukawa, J. R. Hunt and O. M. Yaghi, *J. Am. Chem. Soc.*, 2007, **129**, 12914.
- 14 H. M. El-Kaderi, J. R. Hunt, J. L. Mendoza-Cortes, A. P. Cote, R. E. Taylor, M. O'Keeffe and O. M. Yaghi, *Science*, 2007, **316**, 268-272.

- 15 R. W. Tilford, S. J. Mugavero, P. J. Pellechia and J. J. Lavigne, *Adv. Mater.*, 2008, **20**, 2741-2746.
- 16 J. R. Hunt, C. J. Doonan, J. D. LeVangie, A. P. Côté and O. M. Yaghi, *J. Am. Chem. Soc.*, 2008, **130**, 11872.
- 17 F. J. Uribe-Romo, J. R. Hunt, H. Furukawa, C. O. Klöck, M. Keeffe and O. M. Yaghi, *J. Am. Chem. Soc.*, 2009, **131**, 4570.
- 18 Y. Zhang, J. Su, H. Furukawa, Y. Yun, F. Gándara, A. Duong, X. Zou and O. M. Yaghi, *J. Am. Chem. Soc.* 2013, **135**, 16336.
- 19 S. Wan, F. Gándara, A. Asano, H. Furukawa, A. Saeki, S. K. Dey, L. Liao, M. W. Ambrogio, Y. Y. Botros, X. Duan, S. Seki, J. F. Stoddart and O. M. Yaghi, *Chem. Mater.*, 2011, **23**, 4094.
- 20 F. J. Uribe-Romo, C. J. Doonan, H. Furukawa, K. Oisaki and O. M. Yaghi, *J. Am. Chem. Soc.*, 2011, **133**, 11478.
- 21 D. Guo, R. Shibuya, C. Akiba, S. Saji, T. Kondo and J. Nakamura, *Science*, 2016, **351**, 361.
- 22 T. Zhou, S. Xu, Q. Wen, Z. Pang and X. Zhao, *J. Am. Chem. Soc.*, 2014, **136**, 15885.
- 23 L. Xu, X. Zhou, W. Q. Tian, T. Gao, Y. F. Zhang, S. Lei and Z. F. Liu, *Angew. Chem. Int. Ed.*, 2014, **53**, 9564.
- 24 K. Wang, H. Huang, D. Liu, C. Wang, J. Li and C. Zhong, *Environ. Sci. Tech.*, 2016, **50**, 4869.
- 25 Z. Li, Y. Zhi, X. Feng, X. Ding, Y. Zou, X. Liu and Y. Mu, *Chem. Eur. J.*, 2015, **21**, 12079.
- 26 Z. Li, Y. Zhang, H. Xia, Y. Mu and X. Liu, *Chem. Commun.*, 2016, **52**, 6613.
- 27 S. Ding, J. Gao, Q. Wang, Y. Zhang, W. Song, C. Su and W. Wang, *J. Am. Chem. Soc.*, 2011, **133**, 19816.
- 28 S. Ding, M. Dong, Y. Wang, Y. Chen, H. Wang, C. Su and W. Wang, *J. Am. Chem. Soc.*, 2016, **138**, 3031.
- 29 S. Lin, X. Y. Hou, X. Deng, H. L. Wang, S. Z. Sun and X. M. Zhang, *RSC Adv.*, 2015, **5**, 41017.

- 30 R. Ge, D. Hao, Q. Shi, B. Dong, W. Leng, C. Wang and Y. Gao, *J. Chem. Eng. Data.*, 2016, **61**, 1904.
- 31 V. S. P. K. Neti, X. Wu, M. Hosseini, R. A. Bernal, S. Deng and L. Echegoyen, *CrystEngComm*, 2013, **15**, 7157.
- 32 W. Zhang, P. Jiang, Y. Wang, J. Zhang and P. Zhang, *Catal. Sci. Technol.*, 2015, **5**, 101.
- 33 J. Guo, Y. Xu, S. Jin, L. Chen, T. Kaji, Y. Honsho, M. A. Addicoat, J. Kim, A. Saeki, H. Ihee, S. Seki, S. Irle, M. Hiramoto, J. Gao and D. Jiang, *Nat. Commun.*, 2013, **4**.
- 34 J. Yu, Z. Chen, J. Sun, Z. Huang and Q. Zheng, *J. Mater. Chem.*, 2012, **22**, 5369.
- 35 P. Katekomol, J. Roeser, M. Bojdys, J. Weber and A. Thomas, *Chem. Mater.*, 2013, **25**, 1542.
- 36 P. Kuhn, M. Antonietti and A. Thomas, *Angew. Chem. Int. Ed.*, 2008, **47**, 3450.
- 37 M. J. Bojdys, J. Jeromenok, A. Thomas and M. Antonietti, *Adv. Mater.*, 2010, **22**, 2202.
- 38 X. Chen, M. Addicoat, S. Irle, A. Nagai and D. Jiang, *J. Am. Chem. Soc.*, 2013, **135**, 546-549.
- 39 A. Nagai, X. Chen, X. Feng, X. Ding, Z. Guo and D. Jiang, *Angew. Chem. Int. Ed.*, 2013, **52**, 3770.
- 40 X. Chen, M. Addicoat, S. Irle, A. Nagai and D. Jiang, *J. Am. Chem. Soc.*, 2013, **135**, 546.
- 41 X. Feng, L. Chen, Y. Honsho, O. Saengsawang, L. Liu, L. Wang, A. Saeki, S. Irle, S. Seki, Y. Dong and D. Jiang, *Adv. Mater.*, 2012, **24**, 3026.
- 42 C. R. DeBlase, K. E. Silberstein, T. Truong, H. D. Abruña and W. R. Dichtel, *J. Am. Chem. Soc.*, 2013, **135**, 16821.
- 43 L. A. Baldwin, J. W. Crowe, M. D. Shannon, C. P. Jaroniec and P. L. McGrier, *Chem. Mater.*, 2015, **27**, 6169.
- 44 B. P. Biswal, S. Kandambeth, S. Chandra, D. B. Shinde, S. Bera, S. Karak, B. Garai, U. K. Kharul and R. Banerjee, *J. Mater. Chem. A*, 2015, **3**, 23664.
- 45 S. Kandambeth, V. Venkatesh, D. B. Shinde, S. Kumari, A. Halder, S. Verma and R. Banerjee, *Nat. Commun.*, 2015, **6**, 6786.

- 46 D. B. Shinde, S. Kandambeth, P. Pachfule, R. R. Kumar and R. Banerjee, *Chem. Commun.*, 2015, **51**, 310.
- 47 A. Halder, S. Kandambeth, B. P. Biswal, G. Kaur, N. C. Roy, M. Addicoat, J. K. Salunke, S. Banerjee, K. Vanka, T. Heine, S. Verma and R. Banerjee, *Angew. Chem. Int. Ed.*, 2016, **55**, 806.
- 48 S. Jin, K. Furukawa, M. Addicoat, L. Chen, S. Takahashi, S. Irle, T. Nakamura and D. Jiang, *Chem. Sci.*, 2013, **4**, 4505.
- 49 H. Ma, B. Liu, B. Li, L. Zhang, Y. Li, H. Tan, H. Zang and G. Zhu, *J. Am. Chem. Soc.*, 2016, **138**, 5897.
- 50 X. Feng, L. Liu, Y. Honsho, A. Saeki, S. Seki, S. Irle, Y. Dong, A. Nagai and D. Jiang, *Angew. Chem. Int. Ed.*, 2012, **51**, 2618.
- 51 S. Xu, T. Zhan, Q. Wen, Z. Pang and X. Zhao, *ACS Macro Letters*, 2016, **5**, 99.
- 52 S. Jin, T. Sakurai, T. Kowalczyk, S. Dalapati, F. Xu, H. Wei, X. Chen, J. Gao, S. Seki, S. Irle and D. Jiang, *Chem. Eur. J.*, 2014, **20**, 14608.
- 53 S. Dalapati, M. Addicoat, S. Jin, T. Sakurai, J. Gao, H. Xu, S. Irle, S. Seki and D. Jiang, *Nat. Commun.*, 2015, **6**, 7786.
- 54 N. Huang, R. Krishna and D. Jiang, *J. Am. Chem. Soc.*, 2015, **137**, 7079.
- 55 N. Huang, X. Chen, R. Krishna and D. Jiang, *Angew. Chem. Int. Ed.*, 2015, **54**, 2986.
- 56 Y. Zhu, S. Wan, Y. Jin and W. Zhang, *J. Am. Chem. Soc.*, 2015, **137**, 13772.
- 57 Y. Du, H. Yang, J. M. Whiteley, S. Wan, Y. Jin, S. Lee and W. Zhang, *Angew. Chem. Int. Ed.*, 2016, **55**, 1737.
- 58 M. G. Rabbani, A. K. Sekizkardes, Z. Kahveci, T. E. Reich, R. Ding and H. M. El-Kaderi, *Chem. Eur. J.*, 2013, **19**, 3324.
- 59 D. Kaleeswaran, P. Vishnoi and R. Murugavel, *J. Mater. Chem. C*, 2015, **3**, 7159.
- 60 S. Zhang, X. Zhao, B. Li, C. Bai, Y. Li, L. Wang, R. Wen, M. Zhang, L. Ma and S. Li, *J. Hazard. Mater.*, 2016, **314**, 95.

- 61 D. Beaudoin, T. Maris and J. D. Wuest, *Nat. Chem.*, 2013, **5**, 830.
- 62 Y. Zeng, R. Zou, Z. Luo, H. Zhang, X. Yao, X. Ma, R. Zou and Y. Zhao, *J. Am. Chem. Soc.*, 2015, **137**, 1020.
- 63 Z. Kang, Y. Peng, Y. Qian, D. Yuan, M. A. Addicoat, T. Heine, Z. Hu, L. Tee, Z. Guo and D. Zhao, *Chem. Mater.*, 2016, **28**, 1277.
- 64 S. Chandra, T. Kundu, K. Dey, M. Addicoat, T. Heine and R. Banerjee, *Chem. Mater.*, 2016, **28**, 1489.
- 65 S. Yu, H. Lyu, J. Tian, H. Wang, D. Zhang, Y. Liu and Z. Li, *Polym. Chem.*, 2016, **7**, 3392.
- 66 E. L. Spitler and W. R. Dichtel, *Nat. Chem.*, 2010, **2**, 672.
- 67 A. Bhunia, V. Vasylyeva and C. Janiak, *Chem. Commun.*, 2013, **49**, 3961.
- 68 N. Huang, X. Ding, J. Kim, H. Ihee and D. Jiang, *Angew. Chem. Int. Ed.*, 2015, **54**, 8704.
- 69 L. Y. Bai, S. Z. F. Phua, W. Q. Lim, A. Jana, Z. Luo, H. P. Tham, L. Z. Zhao, Q. Gao and Y. L. Zhao, *Chem. Commun.*, 2016, **52**, 4128.
- 70 Q. Fang, J. Wang, S. Gu, R. B. Kaspar, Z. Zhuang, J. Zheng, H. Guo and S. Qiu, Y. Yan, *J. Am. Chem. Soc.*, 2015, **137**, 8352.
- 71 H. Liao, H. Wang, H. Ding, X. Meng, H. Xu, B. Wang, X. Ai and C. Wang, *J. Mater. Chem. A* , 2016, **4**, 7416.
- 72 B. Nath, W. Li, J. Huang, G. Wang, Z. Fu, M. Yao and G. Xu, *CrystEngComm*, 2016, **18**, 4259.
- 73 S. Wan, J. Guo, J. Kim, H. Ihee and D. Jiang, *Angew. Chem. Int. Ed.*, 2009, **48**, 5439.
- 74 X. Chen, N. Huang, J. Gao, H. Xu, F. Xu and D. Jiang, *Chem. Commun.*, 2014, **50**, 6161.
- 75 Y. Wu, H. Xu, X. Chen, J. Gao and D. Jiang, *Chem. Commun.*, 2015, **51**, 10096.
- 76 S. Dalapati, S. Jin, J. Gao, Y. Xu, A. Nagai and D. Jiang, *J. Am. Chem. Soc.*, 2013, **135**, 17310.
- 77 E. L. Spitler, J. W. Colson, F. J. Uribe-Romo, A. R. Woll, M. R. Giovino, A. Saldivar and W. R. Dichtel, *Angew. Chem. Int. Ed.*, 2012, **51**, 2623.

- 78 Y. Peng, G. Xu, Z. Hu, Y. Cheng, C. Chi, D. Yuan, H. Cheng and D. Zhao, *ACS App. Mater. Inter.*, 2016, **8**, 18505.
- 79 X. Feng, Y. Dong and D. Jiang, *CrystEngComm.*, 2013, **15**, 1508.
- 80 G. H. V. Bertrand, V. K. Michaelis, T. C. Ong, R. G. Griffin and M. Dinca, *Proc. Natl. Acad. Sci.*, 2013, **110**, 4923.
- 81 B. J. Smith, A. C. Overholts, N. Hwang and W. R. Dichtel, *Chem. Commun.*, 2016, **52**, 3690.
- 82 M. O. Blunt, J. C. Russell, N. R. Champness and P. H. Beton, *Chem. Commun.*, 2010, **46**, 7157.
- 83 Z. Kahveci, T. Islamoglu, G. A. Shar, R. Ding and H. M. El-Kaderi, *CrystEngComm*, 2013, **15**, 1524.
- 84 G. Das, B. P. Biswal, S. Kandambeth, V. Venkatesh, G. Kaur, M. Addicoat, T. Heine, S. Verma and R. Banerjee, *Chem. Sci.*, 2015, **6**, 3931.
- 85 L. Stegbauer, K. Schwinghammer and B. V. Lotsch, *Chem. Sci.*, 2014, **5**, 2789.
- 86 L. Wang, B. Dong, R. Ge, F. Jiang, J. Xiong, Y. Gao and J. Xu, *Microporous and Mesoporous Materials*, 2016, **224**, 95.
- 87 S. Chandra, T. Kundu, S. Kandambeth, R. BabaRao, Y. Marathe, S. M. Kunjir and R. Banerjee, *J. Am. Chem. Soc.*, 2014, **136**, 6570.
- 88 S. Wan, J. Guo, J. Kim, H. Ihee and D. Jiang, *Angew. Chem. Int. Ed.*, 2008, **47**, 8826.
- 89 M. Calik, F. Auras, L. M. Salonen, K. Bader, I. Grill, M. Handloser, D. D. Medina, M. Dogru, F. Löbermann, D. Trauner, A. Hartschuh and T. Bein, *J. Am. Chem. Soc.*, 2014, **136**, 17802.
- 90 S. Chandra, S. Kandambeth, B. P. Biswal, B. Lukose, S. M. Kunjir, M. Chaudhary, R. Babarao, T. Heine and R. Banerjee, *J. Am. Chem. Soc.*, 2013, **135**, 17853.
- 91 M. S. Lohse, T. Stassin, G. Naudin, S. Wuttke, R. Ameloot, D. De Vos, D. D. Medina and T. Bein, *Chem. Mater.*, 2016, **28**, 626.
- 92 B. P. Biswal, S. Chandra, S. Kandambeth, B. Lukose, T. Heine and R. Banerjee, *J. Am. Chem. Soc.*, 2013, **135**, 5328.

- 93 G. Das, B. P. Biswal, S. Kandambeth, V. Venkatesh, G. Kaur, M. Addicoat, T. Heine, S. Verma and R. Banerjee, *Chem. Sci.*, 2015, **6**, 3931.
- 94 S. Kandambeth, A. Mallick, B. Lukose, M. V. Mane, T. Heine and R. Banerjee, *J. Am. Chem. Soc.*, 2012, **134**, 19524.
- 95 S. Chandra, T. Kundu, K. Dey, M. Addicoat, T. Heine and R. Banerjee, *Chem. Mater.*, 2016, **28**, 1489.
- 96 L. Xu, S. Ding, J. Liu, J. Sun, W. Wang and Q. Zheng, *Chem. Commun.*, 2016, **52**, 4706.
- 97 S. Mitra, S. Kandambeth, B. P. Biswal, M. A. Khayum, C. K. Choudhury, M. Mehta, G. Kaur, S. Banerjee, A. Prabhune, S. Verma, S. Roy, U. K. Kharul and R. Banerjee, *J. Am. Chem. Soc.*, 2016, **138**, 2823.
- 98 R. Gomes and A. Bhaumik, *RSC Adv.*, 2016, **6**, 28047.
- 99 M. Dogru, M. Handloser, F. Auras, T. Kunz, D. Medina, A. Hartschuh, P. Knochel and T. Bein, *Angew. Chem. Int. Ed.*, 2013, **52**, 2920.
- 100 S. Cai, Y. Zhang, A. B. Pun, B. He, J. Yang, F. M. Toma, I. D. Sharp, O. M. Yaghi, J. Fan, S. Zheng, W. Zhang and Y. Liu, *Chem. Sci.*, 2014, **5**, 4693.
- 101 H. Yang, S. Zhang, L. Han, Z. Zhang, Z. Xue, J. Gao, Y. Li, C. Huang, Y. Yi, H. Liu and Y. Li, *ACS App. Mater. Inter.* 2016, **8**, (8), 5366.
- 102 E. L. Spitler, J. W. Colson, F. J. Uribe-Romo, A. R. Woll, M. R. Giovino, A. Saldivar and W. R. Dichtel, *Angew. Chem. Int. Ed.*, 2012, **51**, 2623.
- 103 L. Bai, Q. Gao and Y. Zhao, *J. Mater. Chem. A*, 2016, **4**, 14106.
- 104 V. S. Vyas, M. Vishwakarma, I. Moudrakovski, F. Haase, G. Savasci, C. Ochsenfeld, J. P. Spatz and B.V. Lotsch, *Adv. Mater.*, 2016, **28**, 8749.
- 105 Y. Peng, W. K. Wong, Z. Hu, Y. Cheng, D. Yuan, S. A. Khan and D. Zhao, *Chem.f Mater.*, 2016, **28**, 5095.
- 106 J. O. Hirschfelder, C. F. Curtiss, R. B. Bird and M. G. Mayer, *Molecular theory of gases and liquids*, Wiley, New York, 1954.

- 107 H. Crone-Munzebrock and G. Doge, *Ber. Bunsenges. Phys. Chem.*, 1990, **94**, 297.
- 108 A. K. Rappe, C. J. Casewit, K. S. Colwell, W. A. GoddardIII, W. M. Skiff, *J. Am. Chem. Soc.* 1992, **114**, 10024.
- 109 S. L. Mayo, B. D. Olafson, W. A. Goddard, *J. Phys. Chem. C*, **1990**, **94**, 8897.
- 110 G. Ii Park, B.S. Choi II, H. Cho, J.H. Kim, *J. Korean Nucl. Soc.* 2000, **32**, 504.
- 111 T. Fukasawa, K. Funabashi, Y. Kondo, *J. Nucl. Sci. Technol.* 1994, **31**, 1073.
- 112 G. Park, I. Kim, J. K. Lee, S. K. Ryu and J. H. Kim, *Carbon Science*, 2001, **2**, 9
